# Supplementary material
Source: publisher figshare collection journal article supplement (https://sage.figshare.com/ndownloader/files/16832378)
Supplement: Supplementary file 1 [file 16832378]

## Online Supplementary Figures

*Online Supplementary Figure 1.* The Mediation Relationship of Self-management between Satisfaction with Social Support and BMI of African Americans with T2D Based on Regression Analyses

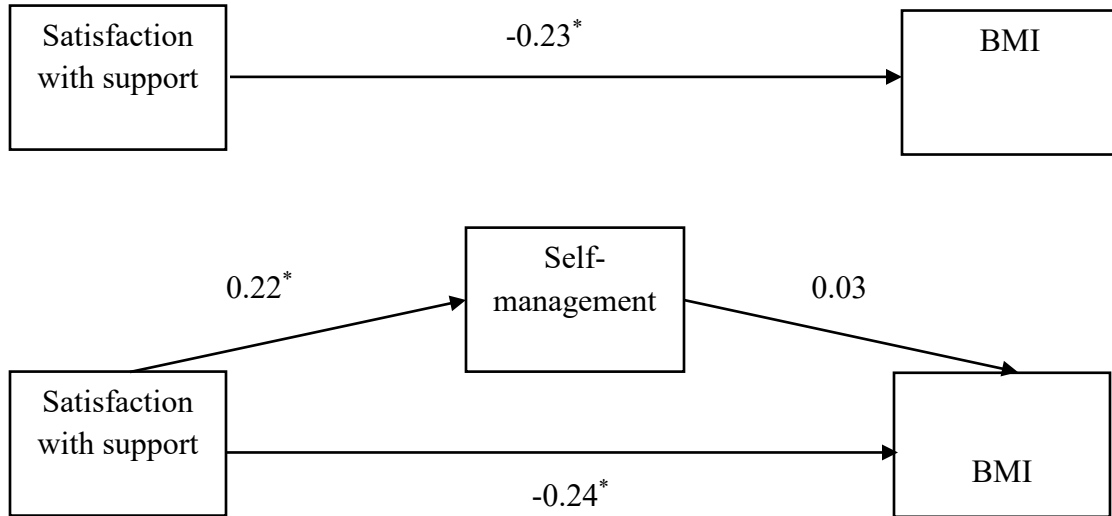

*Online Supplementary Figure 2. The Mediational Relationship of Self-management between Functional Social Support and Depression of African Americans with T2D Based on Regression Analyses*

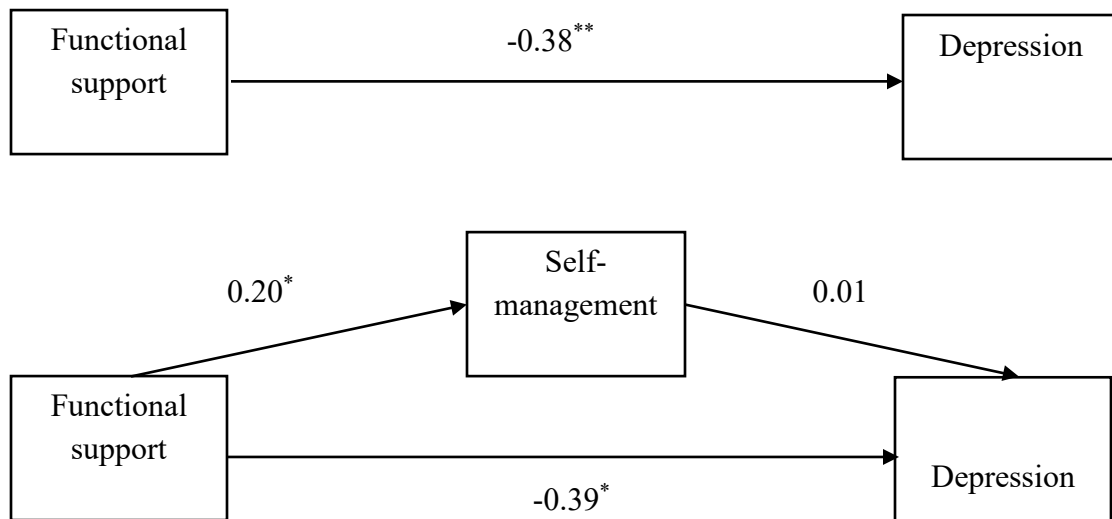

\*Standardized Coefficients ( $p < 0.05$ )

\*\*Standardized Coefficients ( $p < 0.01$ )

\*\*\*Standardized Coefficients ( $p < 0.001$ )

*Online Supplementary Figure 3. The Meditational Relationship of Self-management between Functional Social Support and Stress of African Americans with T2D Based on Regression Analyses*

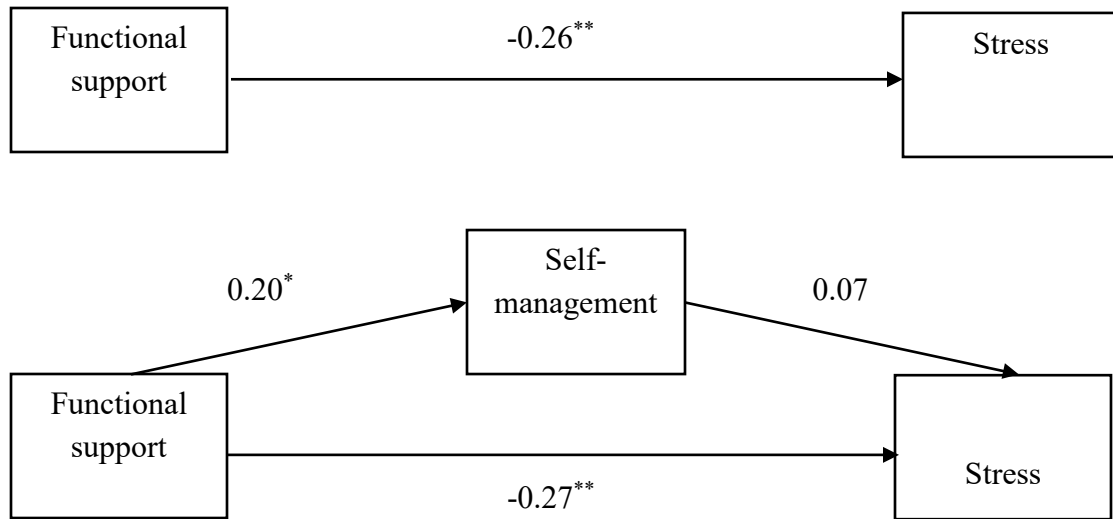

*Online Supplementary Figure 4. The Meditational Relationship of Self-management between Negative Quality of Primary Intimate Relationship and Depression of African Americans with T2D Based on Regression Analyses*

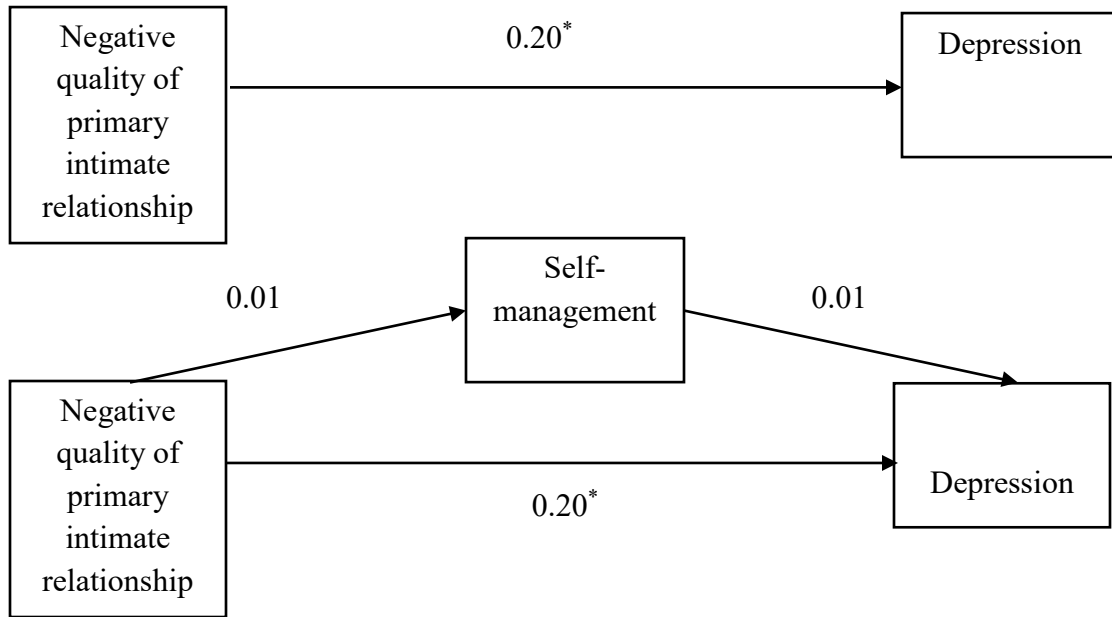

\*Standardized Coefficients ( $p < 0.05$ )

\*\*Standardized Coefficients ( $p < 0.01$ )

\*\*\*Standardized Coefficients ( $p < 0.001$ )

*Online Supplementary Figure 5. The Meditational Relationship of Self-management between Negative Quality of Primary Intimate Relationship and Anxiety of African Americans with T2D Based on Regression Analyses*

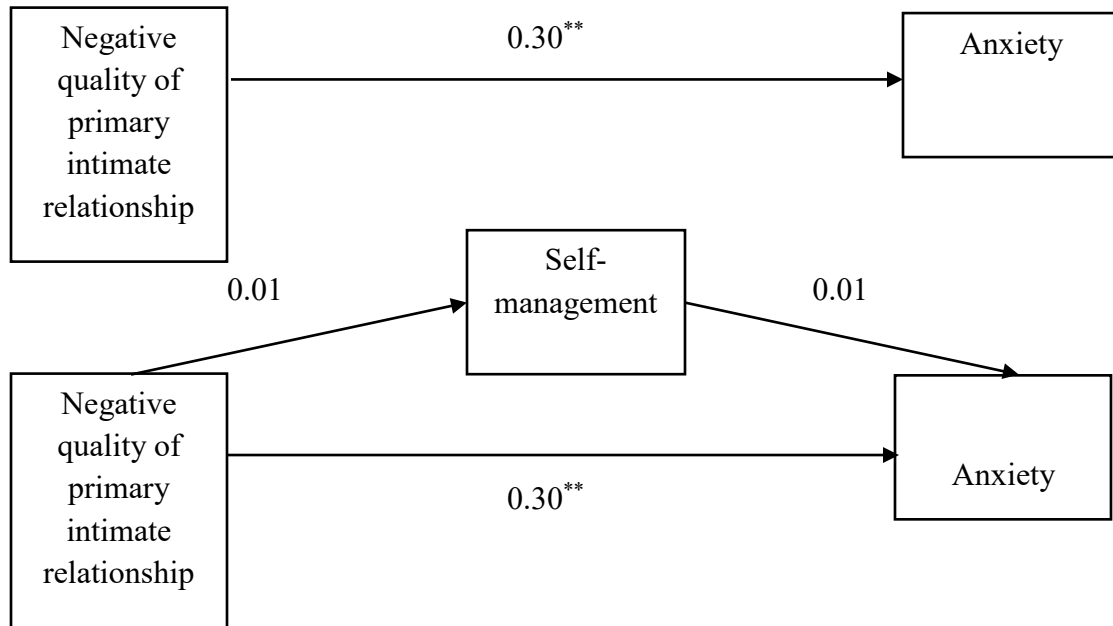

*Online Supplementary Figure 6. The Meditational Relationship of Self-management between Negative Quality of Primary Intimate Relationship and Stress of African Americans with T2D Based on Regression Analyses*

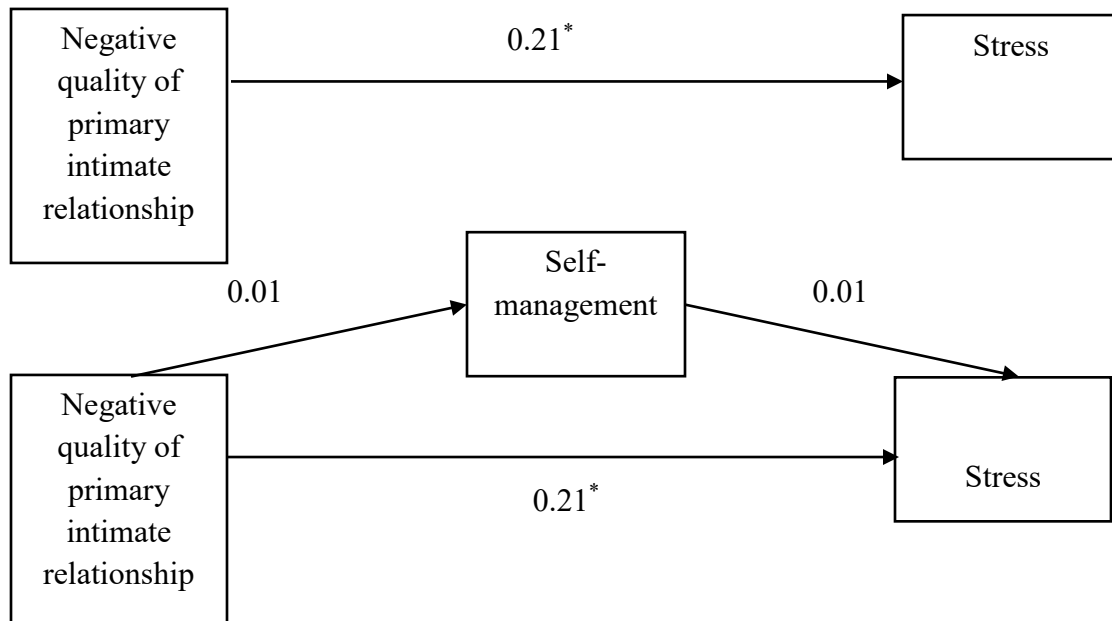

\*Standardized Coefficients ( $p < 0.05$ )

\*\*Standardized Coefficients ( $p < 0.01$ )

\*\*\*Standardized Coefficients ( $p < 0.001$ )
